# Supplementary material
Source: PubMed Central journal article supplement (PMC3011921)
Supplement: Supp_Data.pdf [file Supp_Data.pdf]

## Supplementary Data

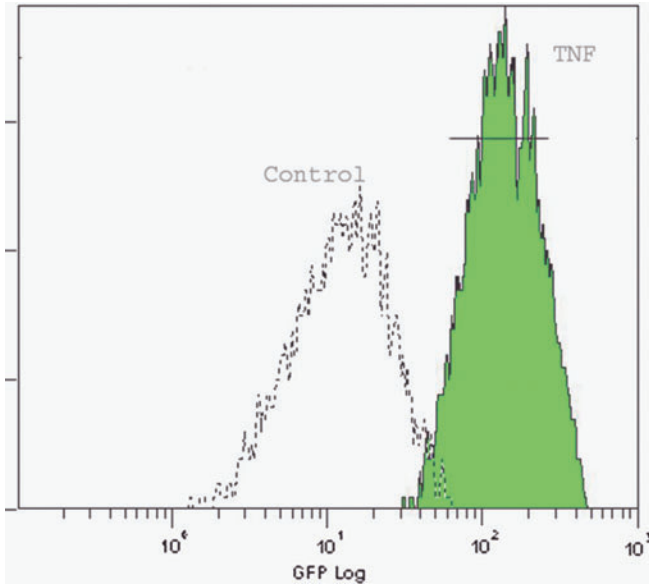

**SUPPLEMENTARY FIG. S1.** Fluorescence profile (fluorescence-activated cell sorting response) of reporter clone of endothelial cells. TNF $\alpha$  stimulation resulted in fluorescence shift as compared to the control. TNF $\alpha$ , tumor necrosis factor  $\alpha$ ; GFP, green fluorescent protein.

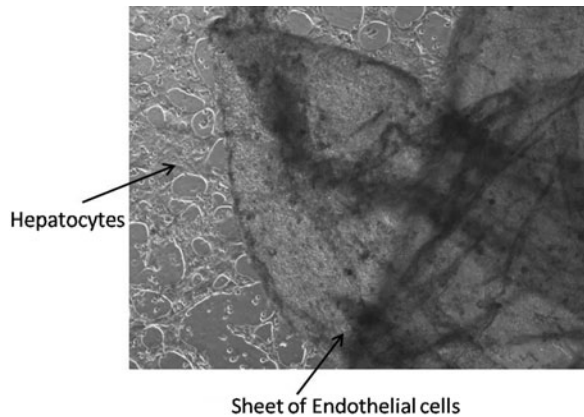

**SUPPLEMENTARY FIG. S2.** Phase-contrast image after short duration collagenase treatment of layered tissue model. The treatment resulted in endothelial cells detaching as a sheet, while hepatocytes still remained embedded in collagen.
